# Supplementary material for: Forensic differentiation between peripheral and menstrual blood in cases of alleged sexual assault—validating an immunochromatographic multiplex assay for simultaneous detection of human hemoglobin and D-dimer
Source: Springer Nature journal article supplement (doi:10.1007/s00414-017-1719-y), 2017-10-23

## Supplementary Material – Document 2

### Electropherograms from “Results and Discussion - 3.3 DNA analysis”

The STR-profiles were generated from A) the sample well and B) the sample-buffer-solution. The swabs contained a mixture of menstrual fluid and semen, which is represented in the electropherograms with a female and a male component. No significant differences in peak height or quality of the profiles results from the two collection methods.

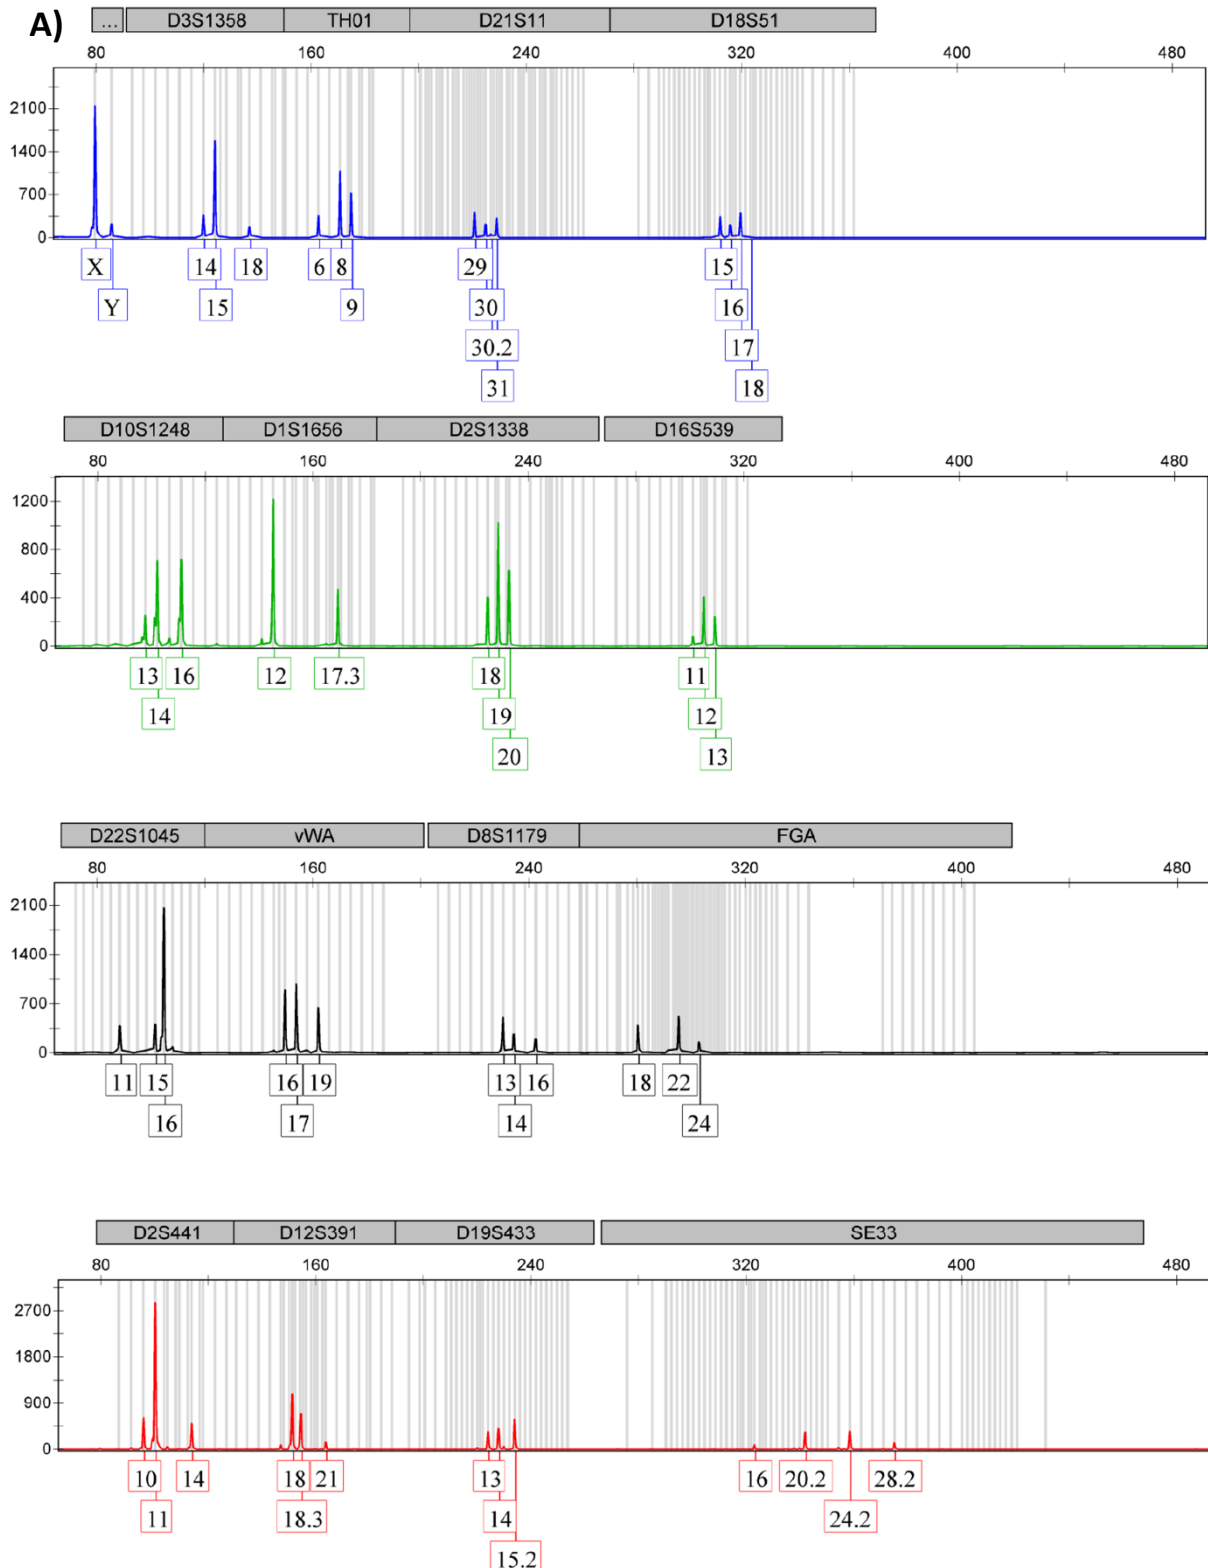

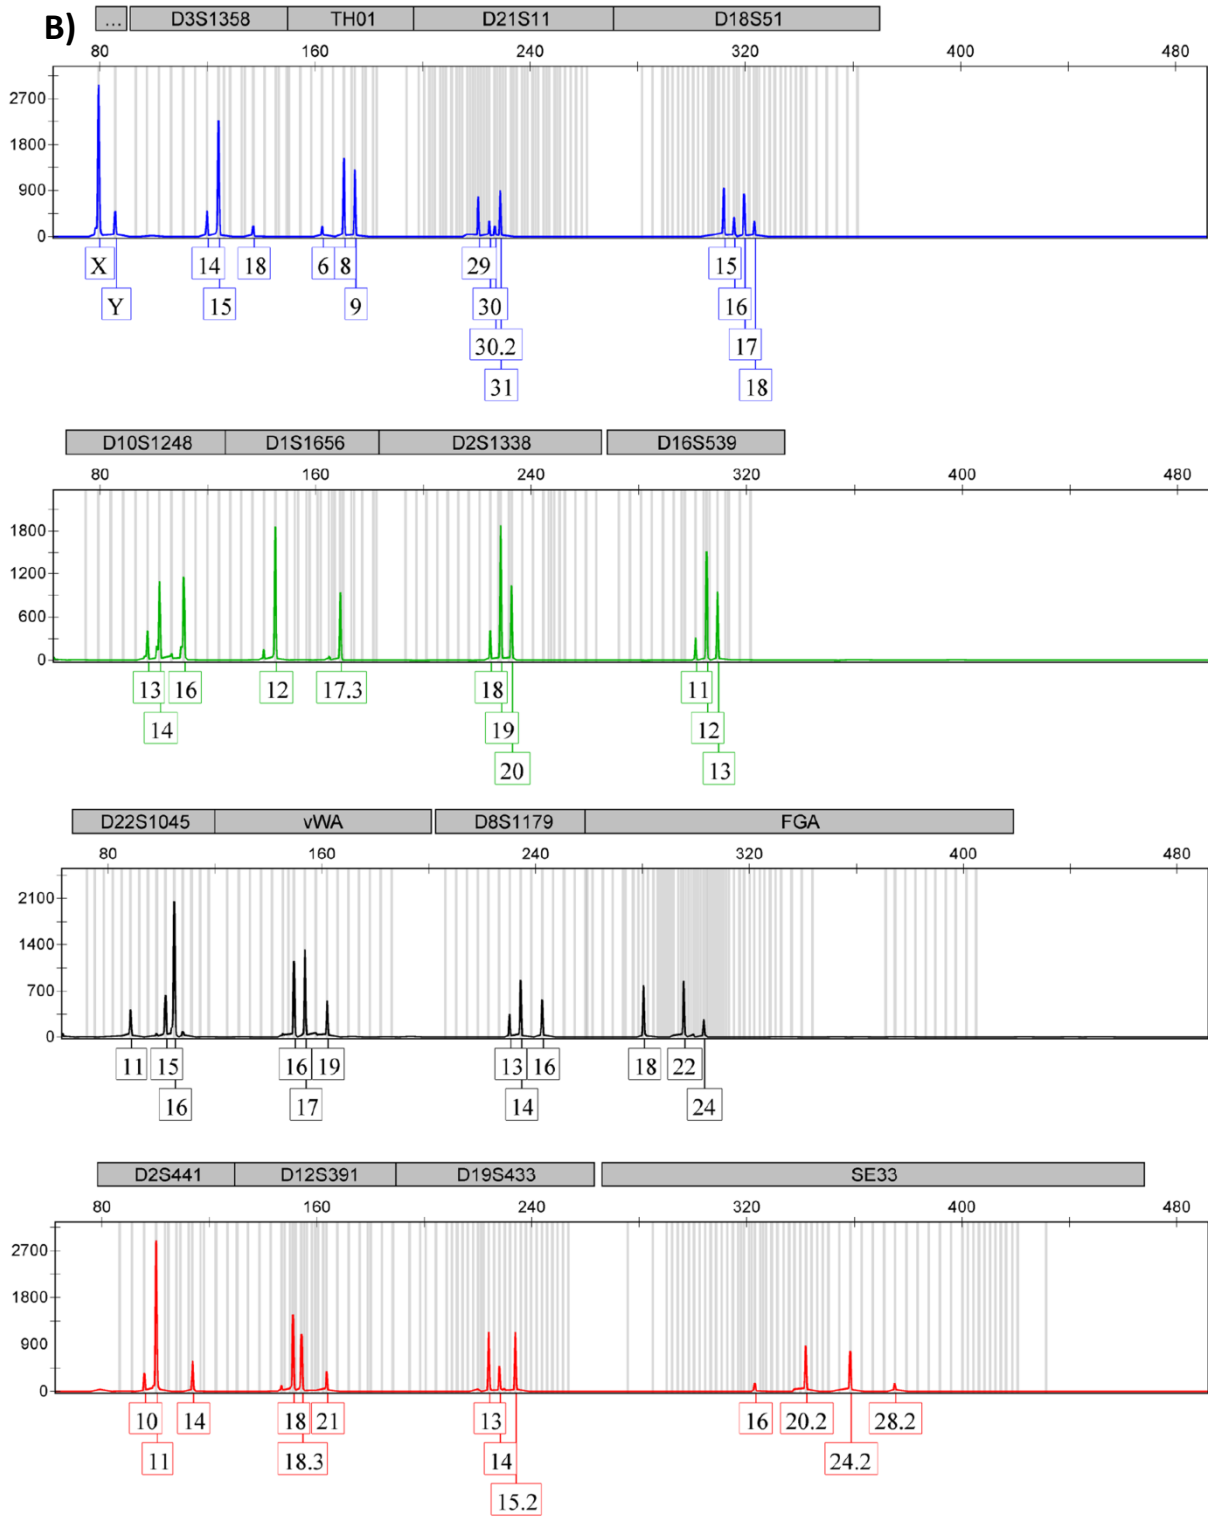

Supplement: MOESM2 [file 15155296]
